# Supplementary material for: Uncertainties in the land use flux resulting from land use change reconstructions and gross land transitions
Source: Copernicus journal article supplement (doi:10.5194/esd-2016-24), 2016-06-21
Supplement: Supplementary file 1 [file esd-2016-24-supplement.pdf]

## Supplementary Information

Table S1. Characteristics of LUC datasets used in this study.

| Land-use model | Model version and reference                                                  | time period |                   | time steps          | Representation of LUC transitions | Spatial coverage                   | Original spatial resolution | Land cover classes                                                                                                                                                |
|----------------|------------------------------------------------------------------------------|-------------|-------------------|---------------------|-----------------------------------|------------------------------------|-----------------------------|-------------------------------------------------------------------------------------------------------------------------------------------------------------------|
|                |                                                                              | from        | to                |                     |                                   |                                    |                             |                                                                                                                                                                   |
| LUH            | update of Hurtt et al. (2011) extending the time-series to 2014              | 1500        | 2014 <sup>a</sup> | annual              | net/gross                         | globe                              | 0.5°                        | cropland, pasture, primary natural vegetation, secondary natural vegetation, urban                                                                                |
| RAMA           | update of Ramankutty and Foley (1999) extending the time-series to 2007      | 1700        | 2007              | annual              | net                               | globe                              | 0.5°                        | cropland, pasture, primary natural vegetation, secondary natural vegetation, urban                                                                                |
| HYDE           | update of HYDE 3.1 (Klein Goldewijk et al., 2010, 2011) extending it to 2005 | 10.000 BC   | 2005              | annual <sup>b</sup> | net                               | globe                              | 5'                          | cropland, pasture, natural vegetation <sup>c</sup>                                                                                                                |
| HILDA          | HILDA v 2.0 (Fuchs et al., 2015b)                                            | 1900        | 2010              | decadal             | net <sup>d</sup> /gross           | EU27 <sup>e</sup> plus Switzerland | 1 km                        | cropland, grassland (incl. managed pastures and shrubland), forest, settlements, water, other land (glaciers, sparsely vegetated areas, beaches and water bodies) |

<sup>a</sup>end date of historical land use data set, <sup>b</sup>decadal data until 2000, <sup>c</sup>natural vegetation is calculated as a remainder, <sup>d</sup>the HILDA net dataset used in this study was derived from the gross dataset (see methods), <sup>e</sup>European Union 2007-2013.

Table S2. Global carbon stocks and fluxes from this study compared against literature studies where multiple land-use data sets were used. Total C stocks comprise besides vegetation, soil and litter C also C in the product pool. Averaging periods were selected according to the available studies.

| Study                     | Land use model          | E <sub>LUC</sub> [Pg C a <sup>-1</sup> ] |                             |                             | Cumulative E <sub>LUC</sub> [Pg C] net | Loss in total C stocks due to LUC activities [Pg C] |                            | Vegetation C stocks [Pg C] net |                         | Soil C stocks [Pg C] net  |                           | LUC model and additional information                                                                                                                                                                                                       |
|---------------------------|-------------------------|------------------------------------------|-----------------------------|-----------------------------|----------------------------------------|-----------------------------------------------------|----------------------------|--------------------------------|-------------------------|---------------------------|---------------------------|--------------------------------------------------------------------------------------------------------------------------------------------------------------------------------------------------------------------------------------------|
|                           |                         | net                                      | net                         | net                         |                                        | net                                                 | gross                      | net                            | net                     | net                       |                           |                                                                                                                                                                                                                                            |
| Averaging period          |                         | 1980-1989                                | 1990-1999                   | 2000-2005                   | 1900-2005                              | 1700-1992                                           | 1700-1992                  | 1850-1859                      | 1981-2000               | 1850-1859                 | 1981-2000                 |                                                                                                                                                                                                                                            |
| This study                | LUH                     | 1.10                                     | 1.18                        | 1.44                        | 137                                    | -103                                                | -143                       | 438                            | 404                     | 1431                      | 1401                      |                                                                                                                                                                                                                                            |
| This study                | RAMA                    | 1.40                                     | 1.57                        | 1.61                        | 154                                    | -104                                                | -                          | 473                            | 430                     | 1497                      | 1470                      |                                                                                                                                                                                                                                            |
| This study                | HYDE                    | 1.55                                     | 2.65                        | 2.20                        | 171                                    | -97                                                 | -                          | 476                            | 433                     | 1505                      | 1479                      |                                                                                                                                                                                                                                            |
| This study                | Average and uncertainty | 1.35<br>± 0.23                           | 1.80<br>± 0.76              | 1.75<br>± 0.40              | 154<br>± 17                            | -101<br>± 4                                         | -                          | 462<br>± 21                    | 422<br>± 16             | 1478<br>± 41              | 1450<br>± 43              |                                                                                                                                                                                                                                            |
| Arora and Boer (2010)     | 2 models                | -                                        | 0.55<br>± 0.42 <sup>b</sup> | -                           | -                                      | -                                                   | -                          | 554<br>± 13 <sup>b</sup>       | 541<br>± 0 <sup>b</sup> | 1585<br>± 40 <sup>b</sup> | 1598<br>± 57 <sup>b</sup> | CanESM1 model; LUC used was (1) cropland from Ramankutty and Foley (1999), (2) cropland and pasture based on Klein Goldewijk (2001)                                                                                                        |
| Houghton et al. (2012)    | 13 models               | 1.14<br>± 0.23                           | 1.12<br>± 0.25              | -                           | -                                      | -                                                   | -                          | -                              | -                       | -                         | -                         | synthesis of 13 estimates of different sources see their Table 1                                                                                                                                                                           |
| Jain et al. (2013)        | 3 models                | 1.88<br>± 0.26 <sup>a</sup>              | 1.68<br>± 0.18 <sup>a</sup> | 1.40<br>± 0.21 <sup>a</sup> | 167<br>± 9.6 <sup>a</sup>              | -                                                   | -                          | -                              | -                       | -                         | -                         | ISAM C-N model; used LUC data were Houghton (2008), Ramankutty and Foley (1999), Klein Goldewijk et al. (2011)                                                                                                                             |
| Shevliakova et al. (2009) | 2 models                | -                                        | -                           | -                           | -                                      | 186<br>± 35 <sup>b</sup>                            | 267<br>± 38 <sup>a,b</sup> | -                              | -                       | -                         | -                         | LVM3V model; LUC used was (1) cropland from Ramankutty and Foley (1999) and pasture from Klein Goldewijk (2001), (2) cropland and pasture based on Klein Goldewijk (2001); proportional scaling of natural vegetation for each combination |

<sup>a</sup>including wood harvest, <sup>b</sup>no nitrogen limitation.

Table S3. European carbon stocks and fluxes from this study compared against literature studies where net and gross land-use transitions were considered. Averaging periods were selected according to the available study.

| Study                                           | Land use model          | Vegetation C stocks [Tg C] |                   |                   |           |           |           | LUC model and additional information                                                                                                                                                                                                                                                                                                                                                             |
|-------------------------------------------------|-------------------------|----------------------------|-------------------|-------------------|-----------|-----------|-----------|--------------------------------------------------------------------------------------------------------------------------------------------------------------------------------------------------------------------------------------------------------------------------------------------------------------------------------------------------------------------------------------------------|
|                                                 |                         | net                        |                   |                   | gross     |           |           |                                                                                                                                                                                                                                                                                                                                                                                                  |
| Averaging period                                |                         | 1981-1990                  | 1991-2000         | 2001-2010         | 1981-1990 | 1991-2000 | 2001-2010 |                                                                                                                                                                                                                                                                                                                                                                                                  |
| This study                                      | HILDA                   | 9 227                      | 9 788             | 10 518            | 9 061     | 9 626     | 10 360    |                                                                                                                                                                                                                                                                                                                                                                                                  |
| This study                                      | LUH                     | 11 518                     | 12 436            | 13 484            | -         | -         | -         |                                                                                                                                                                                                                                                                                                                                                                                                  |
| This study                                      | Average and uncertainty | 10 373<br>± 1 620          | 11 112<br>± 1 872 | 12 001<br>± 2 097 | -         | -         | -         |                                                                                                                                                                                                                                                                                                                                                                                                  |
| Fuchs et al. (2015a) and personal communication | Fuchs et al. (2015b)    | 11 228                     | 12 228            | 12 876            | 11 360    | 12 399    | 12 916    | C stocks and fluxes were derived using a bookkeeping method, see Fuchs et al. (2015a), at 1 km spatial resolution. Values used here were communicated personally. Note: net dataset used by Fuchs et al. (2015a) and used in this study show minor deviations due to different land use allocation in HILDA under net and gross transitions that are not considered in this study (see methods). |

Table S4. Global carbon stocks and fluxes from this study compared against literature studies where net and gross land-use transitions were considered. Total C stocks comprise besides vegetation, soil and litter C also C in the product pool. Averaging periods were selected according to the available studies. Numbers in parentheses in gross columns give the deviation from the corresponding net value.

| Study                       | Land use model                      | $E_{LUC}$ [Pg C a <sup>-1</sup> ] |             |                     |             |                             |              |                             |              | Cumulative $E_{LUC}$ [Pg C] |           |                    |                        |           |                          | Loss in total C stocks due to LUC activities [Pg C] |                   | LUC model and additional information |                                                                                                                                                                                                                                        |                                                         |
|-----------------------------|-------------------------------------|-----------------------------------|-------------|---------------------|-------------|-----------------------------|--------------|-----------------------------|--------------|-----------------------------|-----------|--------------------|------------------------|-----------|--------------------------|-----------------------------------------------------|-------------------|--------------------------------------|----------------------------------------------------------------------------------------------------------------------------------------------------------------------------------------------------------------------------------------|---------------------------------------------------------|
|                             |                                     | net                               |             |                     |             | gross                       |              |                             |              | net                         |           |                    | gross                  |           |                          | net                                                 | gross             |                                      |                                                                                                                                                                                                                                        |                                                         |
|                             |                                     | 1850-2005                         | 1980-1989   | 1990-1999           | 2000-2004   | 1850-2005                   | 1980-1989    | 1990-1999                   | 2000-2004    | 1850-1990                   | 1850-2004 | 1850-2005          | 1850-1990              | 1850-2004 | 1850-2005                | 1860-2005                                           | 1700-1992         |                                      | 1700-1992                                                                                                                                                                                                                              |                                                         |
| Averaging period            |                                     |                                   |             |                     |             |                             |              |                             |              |                             |           |                    |                        |           |                          |                                                     |                   |                                      |                                                                                                                                                                                                                                        |                                                         |
| This study                  | LUH                                 | 1.14                              | 1.10        | 1.18                | 1.46        | 1.31                        | 1.28         | 1.41                        | 1.68         | 158                         | 176       | 177                | 181                    | 202       | 204                      | 196                                                 | -103              | -143                                 |                                                                                                                                                                                                                                        |                                                         |
| This study                  | RAMA                                | 1.22                              | 1.40        | 1.57                | 2.06        | -                           | -            | -                           | -            | 167                         | 191       | 191                | -                      | -         | -                        | -                                                   | -104              | -                                    |                                                                                                                                                                                                                                        |                                                         |
| This study                  | HYDE                                | 1.30                              | 1.55        | 2.65                | 2.31        | -                           | -            | -                           | -            | 164                         | 200       | 202                | -                      | -         | -                        | -                                                   | -97               | -                                    |                                                                                                                                                                                                                                        |                                                         |
| This study                  | Average and uncertainty             | 1.22 ± 0.08                       | 1.35 ± 0.23 | 1.80 ± 0.76         | 1.95 ± 0.44 | -                           | -            | -                           | -            | 163 ± 5                     | 189 ± 13  | 190 ± 13           | -                      | -         | -                        | -                                                   | -101 ± 4          | -                                    |                                                                                                                                                                                                                                        |                                                         |
| Olofsson and Hickler (2008) | Klein Goldewijk (2001) <sup>d</sup> | -                                 | -           | -                   | -           | -                           | -            | -                           | -            | 115 <sup>b</sup>            | -         | -                  | 148 <sup>b</sup> (+33) | -         | -                        | -                                                   | -                 | -                                    | LPJ model run at 0.5° x 0.5° spatial resolution; areas for shifting cultivation were assigned South of 25°N based on a number of suitability criteria (e.g. not under permanent agriculture, altitude, productivity, population, etc.) |                                                         |
| Shevliakova et al. (2009)   | Klein Goldewijk (2001) <sup>d</sup> | -                                 | -           | -                   | -           | -                           | -            | -                           | -            | -                           | -         | -                  | -                      | -         | -                        | -                                                   | -161 <sup>b</sup> | -240 <sup>a,b</sup> (+79)            | LM3V run at 2° latitude x 2.5° longitude, spatial resolution, areas for shifting cultivation were assigned between 23°N and South of 23°S; numbers here are exclusively for LUC from Klein Goldewijk (2001)                            |                                                         |
| Shevliakova et al. (2013)   | Hurtt et al. (2011)                 | -                                 | -           | -                   | -           | -                           | -            | -                           | -            | -                           | -         | -                  | -                      | -         | -                        | 210 <sup>a,b,c</sup>                                | -                 | -                                    | ESM2G, run at ~2° x 2° spatial resolution                                                                                                                                                                                              |                                                         |
| Stocker et al. (2013)       | Hurtt et al. (2011)                 | -                                 | 1.55        | 1.57                | 1.21        | -                           | 1.76 (+0.21) | 1.83 (+0.26)                | 1.44 (+0.23) | -                           | 171       | -                  | -                      | 196 (+25) | -                        | -                                                   | -                 | -                                    | LPX-Bern 1.0 run at 1° x 1° spatial resolution, numbers here exclude wood harvest                                                                                                                                                      |                                                         |
| Wilkenskjeld et al. (2014)  | Hurtt et al. (2011)                 | 0.90 <sup>a,b</sup>               | -           | 1.40 <sup>a,b</sup> | -           | 1.44 <sup>a,b</sup> (+0.54) | -            | 2.05 <sup>a,b</sup> (+0.65) | -            | -                           | -         | 140 <sup>a,b</sup> | -                      | -         | 225 <sup>a,b</sup> (+85) | -                                                   | -                 | -                                    | -                                                                                                                                                                                                                                      | JSBACH/CBALANCE run at 1.87° x 1.87° spatial resolution |

<sup>a</sup>including wood harvest, <sup>b</sup>no nitrogen limitation, <sup>c</sup>calculated for pre-industrial climate and CO<sub>2</sub> using a bookkeeping method, <sup>d</sup>shifting cultivation was explicitly implemented in the land use model.

Table S5. Global carbon stocks and fluxes from LPJ-GUESS simulations started in 1700 and 1900 with the LUH dataset under gross and net LUC transitions.

| Land use model and starting time | Averaging period | Calculation                 | Unit                 | LUH started in 1700 |          | LUH started in 1900 |          |
|----------------------------------|------------------|-----------------------------|----------------------|---------------------|----------|---------------------|----------|
|                                  |                  |                             |                      | net                 | gross    | net                 | gross    |
| $E_{LUC}$                        | 2005-2014        | $E_{LUC\ Net/Gross}$        | Pg C a <sup>-1</sup> | 1.50                | 1.64     | 1.17                | 1.34     |
| <b>Cum <math>E_{LUC}</math></b>  | 1950-2014        | $\Sigma E_{LUC\ Net/Gross}$ | Pg C                 | 89.77               | 104.55   | 74.38               | 91.11    |
| <b>Vegetation C</b>              | 2005-2014        | $VegC_{Net/Gross}$          | PgC                  | 421.48              | 386.64   | 420.04              | 385.63   |
| <b>Soil C</b>                    | 2005-2014        | $SoilC_{Net/Gross}$         | PgC                  | 1 406.78            | 1 395.56 | 1 374.26            | 1 363.52 |

a

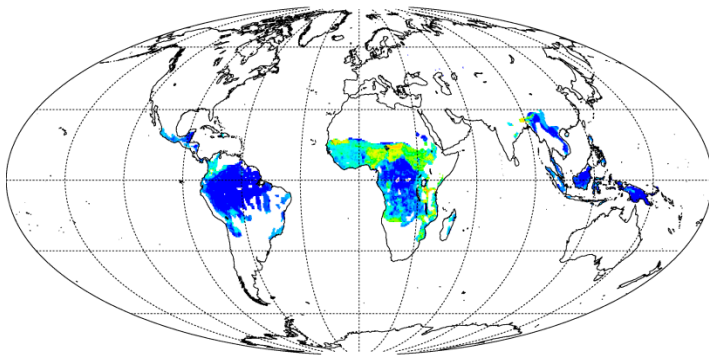

0 1 2 3 4 5  
Difference in loss in natural area [ $10^{10}$  km<sup>2</sup>]

b

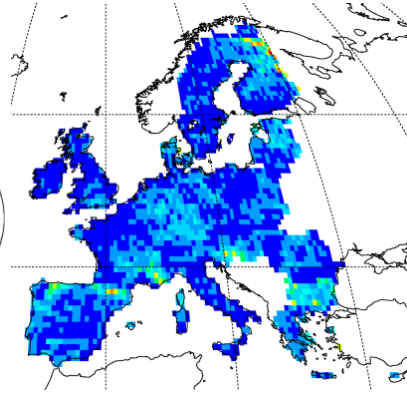

0 100 300 500 700  
Difference in loss in natural area [km<sup>2</sup>]

Fig. S1. Spatial pattern of areas of gross land changes globally based on the LUH dataset and for Europe (EU27+CH) based on HILDA (sum of converted area in addition to net changes from 1700-2014 for LUH and 1900-2010 for HILDA). In LUH, gross changes are limited to tropical regions where shifting cultivation is assumed. The HILDA dataset maps gross transitions over whole of Europe.

Fig. S2. Global LUC change over time for 8 biomes (a). Evolution of absolute land area of croplands, pastures and natural vegetation (including barren land) in global historical land use reconstructions (b, LUH: solid line, RAMA: dash-dotted line, HYDE: dotted line) for 8 biomes. Biomes were derived with LPJ-GUESS based on average Leaf Area Index in 2005-2014 from a simulation of potential natural vegetation (see Bayer et al., 2015 for methodology and classification).

a

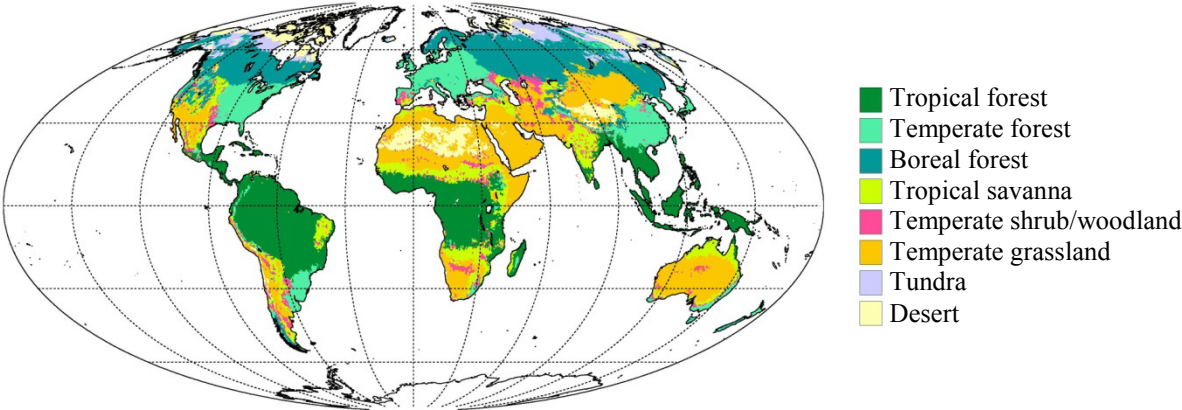

b

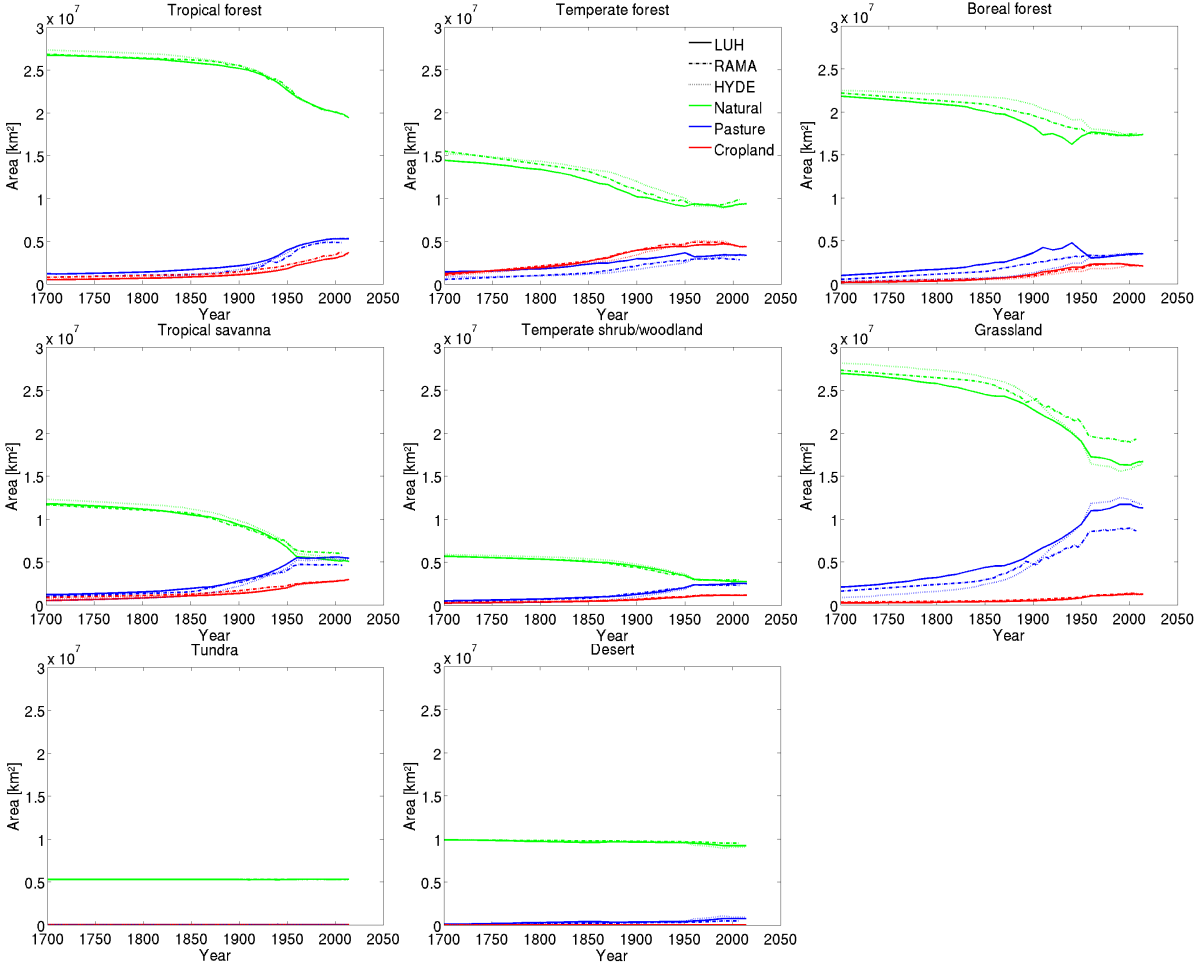

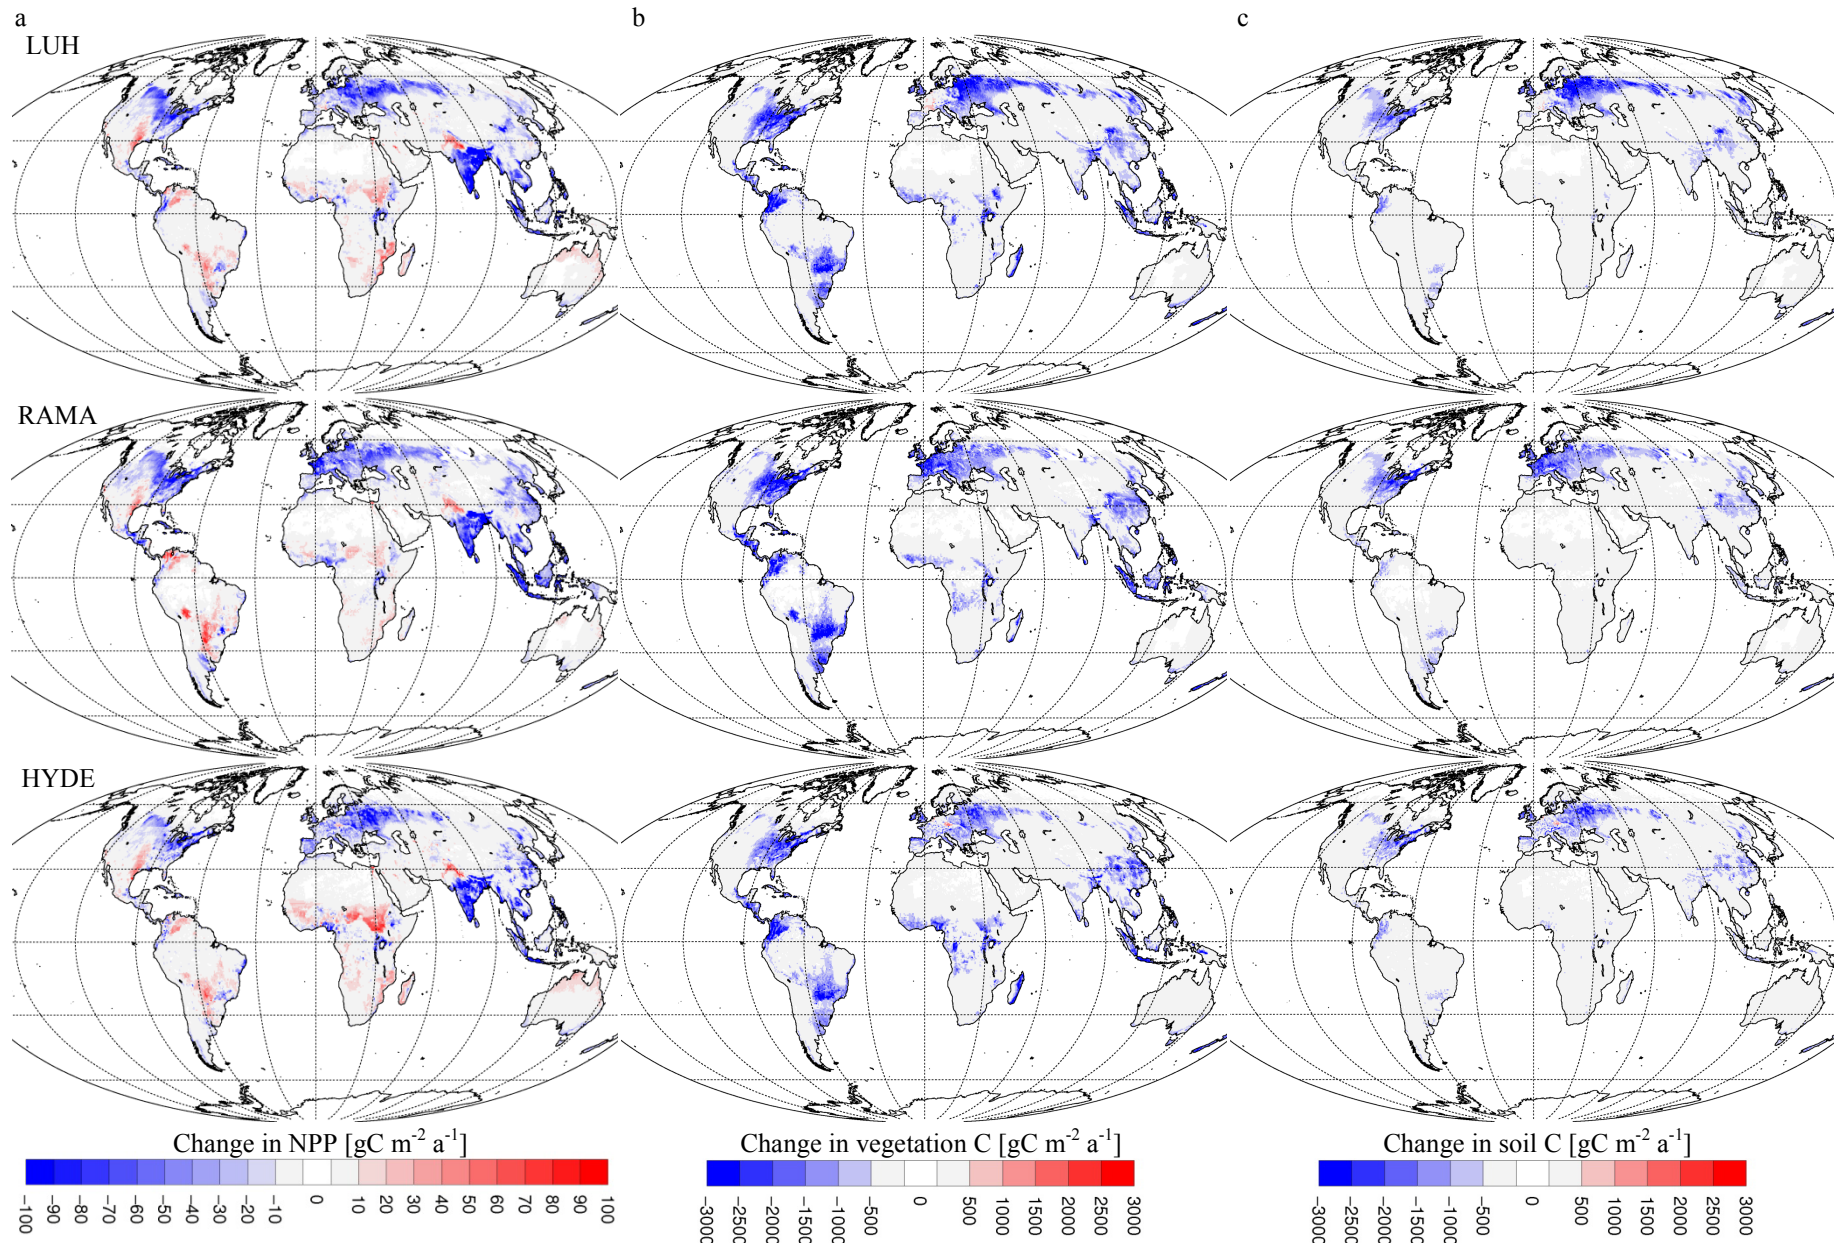

Fig. S3. Impact of land use and land cover changes on NPP (a), vegetation (b) and soil C (c) for the three global land use reconstructions (average change due to LUC 1700-2007).

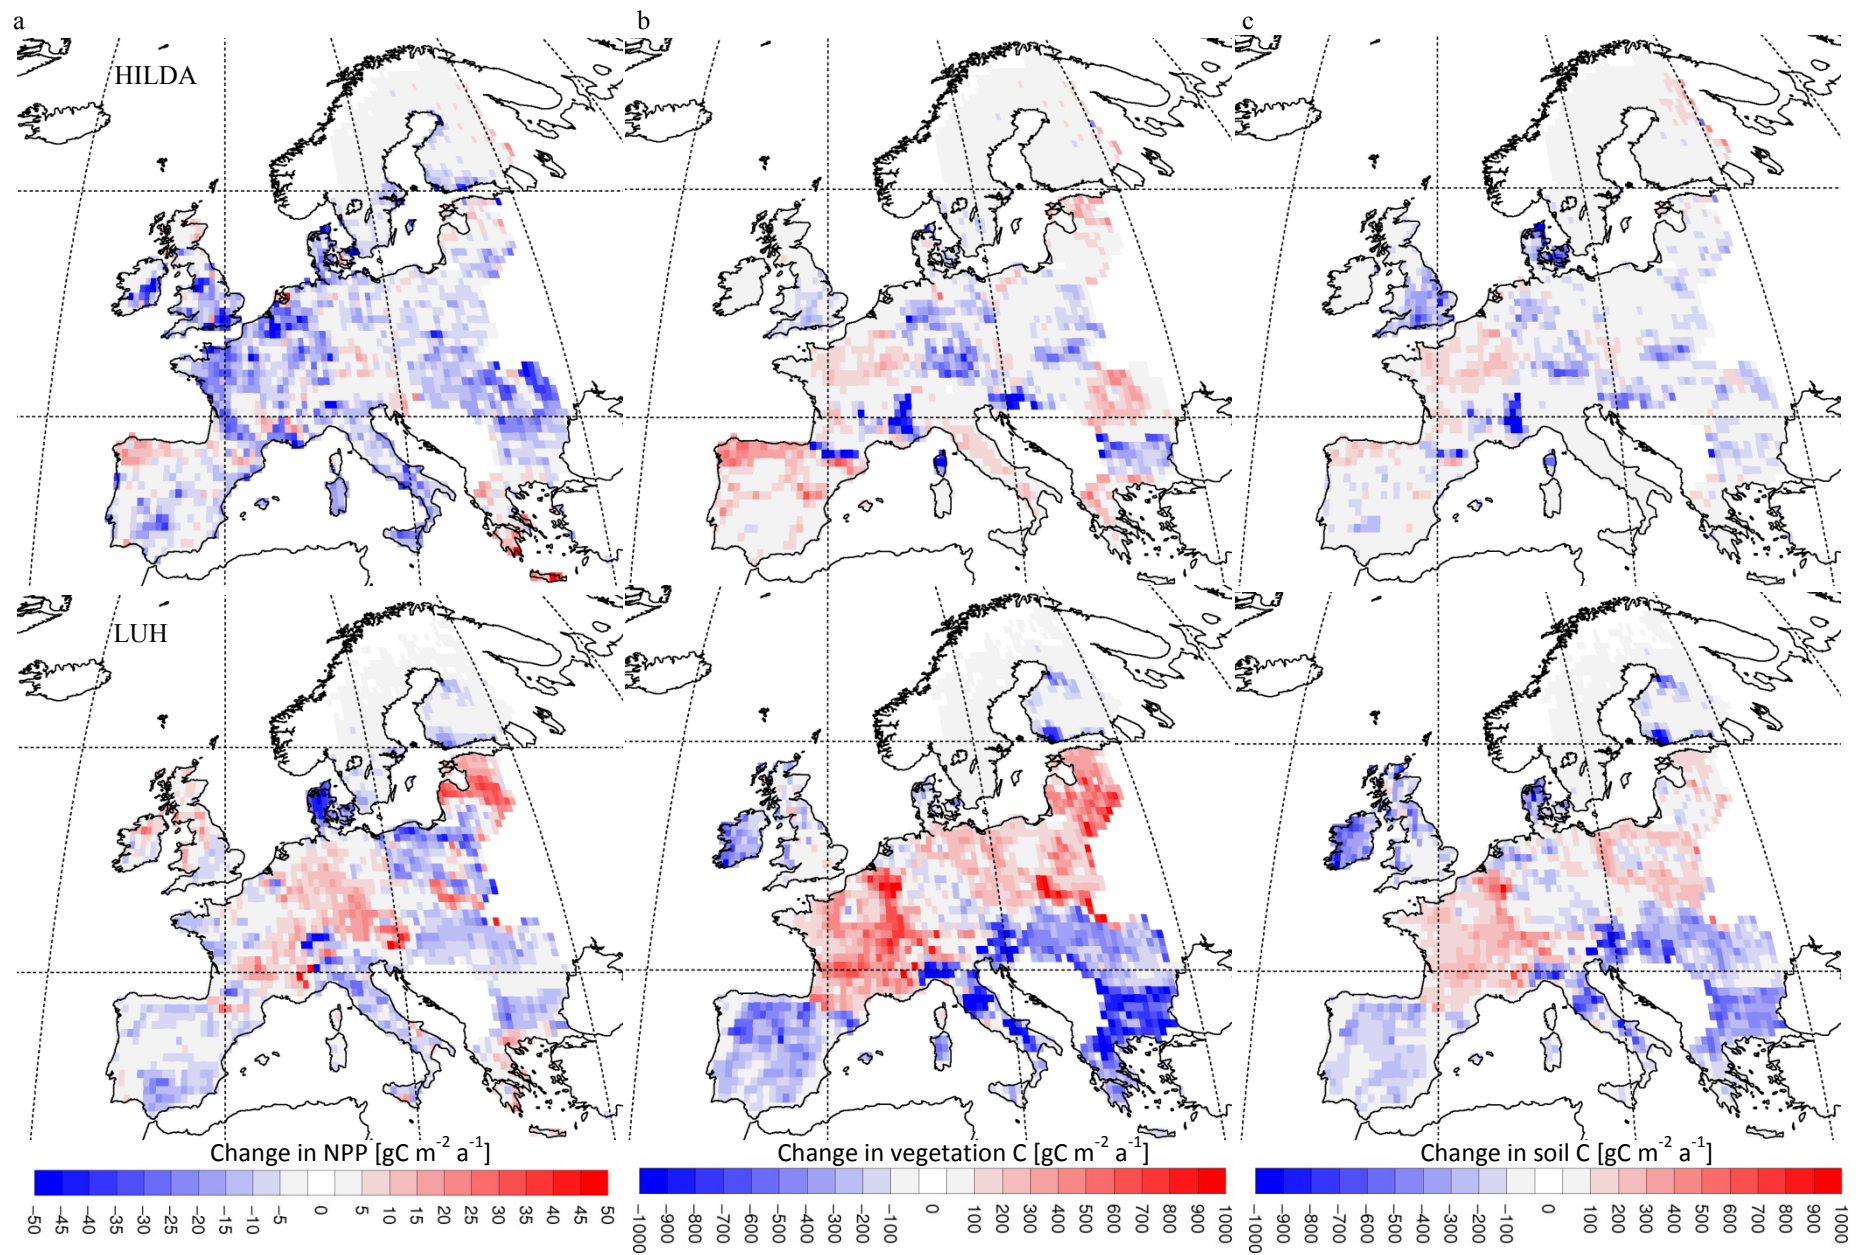

Fig. S4. Impact of land use and land cover changes on NPP (a), vegetation (b) and soil C (c) for the two European land use reconstructions (average change due to LUC 1900-2010).



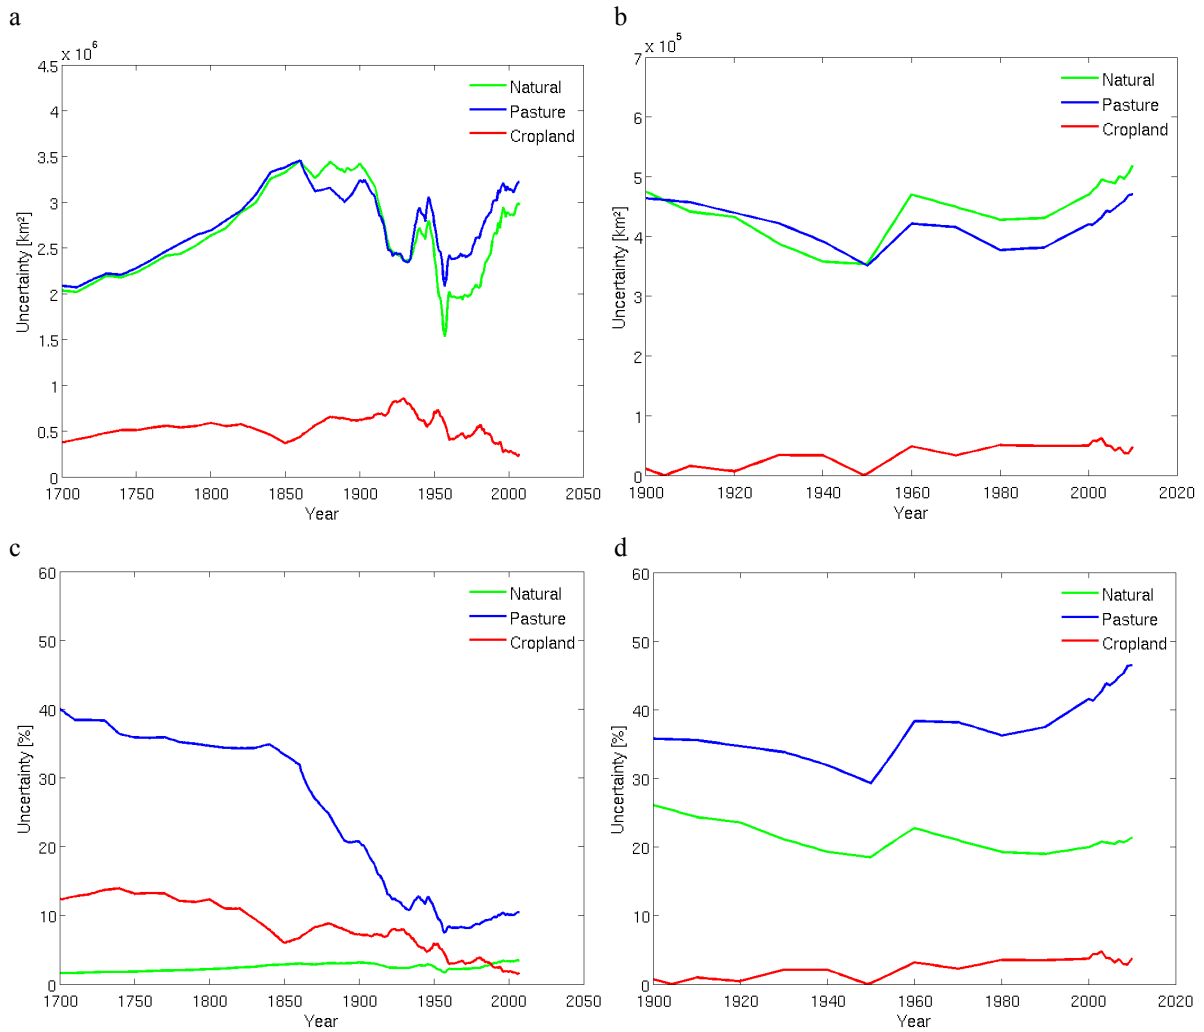

Fig. S5. Deviations in land area under natural, cropland and pasture between three global (a, c) and two European (EU27+CH) net historical LUC reconstructions (b, d). Upper panels (a, b) give the uncertainty (standard deviation) in LUC as absolute area per year and lower panels give uncertainty as fraction of the average area of this land use in the respective year (b, d).

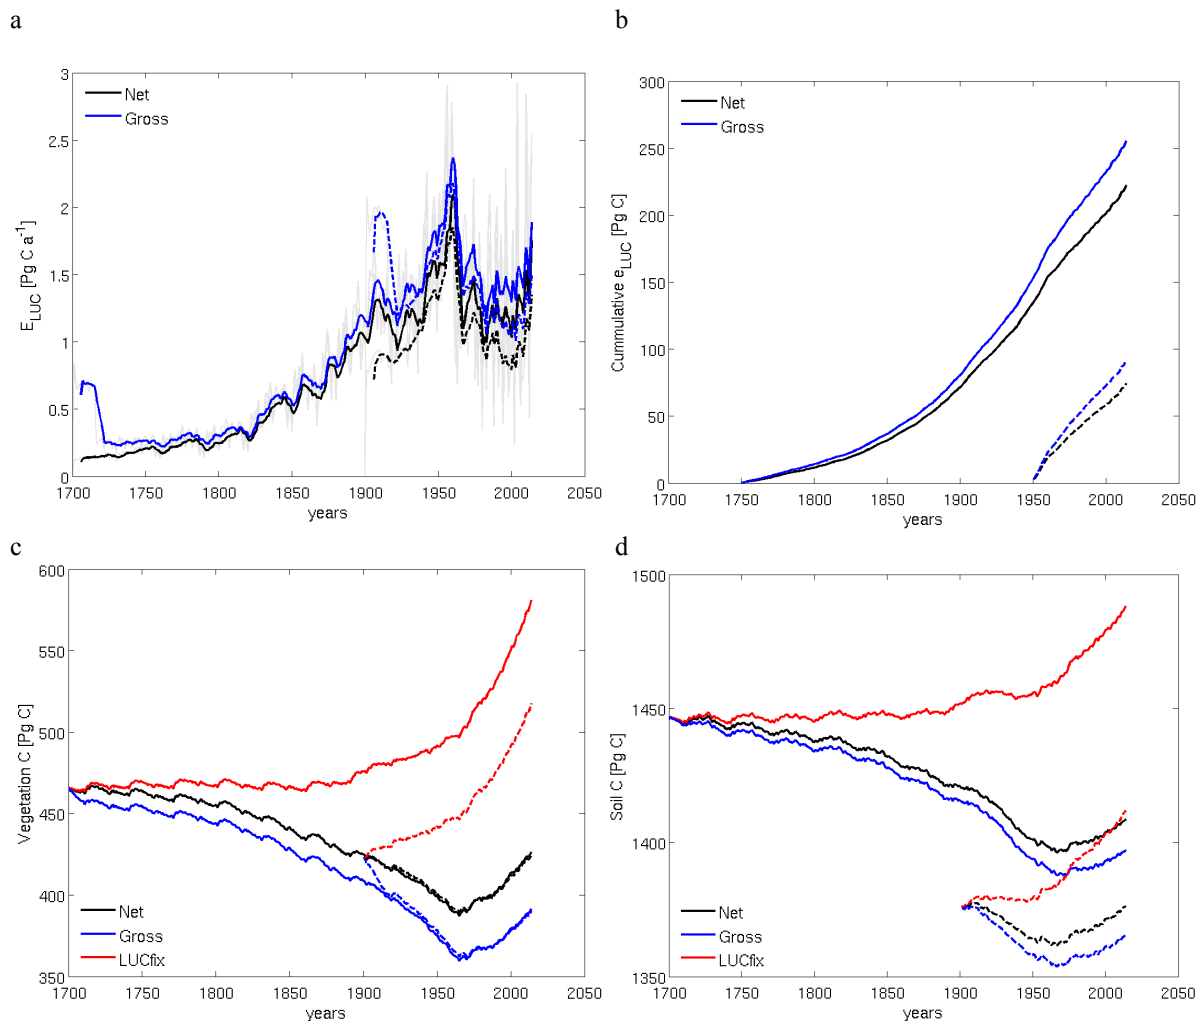

Fig. S6. Effects of different starting times on global carbon stocks and fluxes simulated with LUH data started in 1700 and 1900. Land use flux (a), cumulative land use flux (b), vegetation (c) and soil C (d). Flux values in (a) are given as 15-yr averages with original values in the background.  $E_{LUC}$  was cumulated over 1750-2014 and 1950-2014 so to exclude the first years where C fluxes are adjusting to the equilibrium under shifting cultivation (see methods). C stocks differ already in the first simulation year because of different land uses in 1700 and 1900.

## References

- Arora, V. K. and Boer, G. J.: Uncertainties in the 20th century carbon budget associated with land use change, *Glob. Chang. Biol.*, 16(12), 3327–3348, doi:10.1111/j.1365-2486.2010.02202.x, 2010.
- Bayer, A. D., Pugh, T. A. M., Krause, A. and Arneith, A.: Historical and future quantification of terrestrial carbon sequestration from a Greenhouse-Gas-Value perspective, *Glob. Environ. Chang.*, 32, 153–164, doi:10.1016/j.gloenvcha.2015.03.004, 2015.
- Fuchs, R., Schulp, C. J. E., Hengeveld, G. M., Verburg, P. H., Clevers, J. G. P. W., Schelhaas, M.-J. and Herold, M.: Assessing the influence of historic net and gross land changes on the carbon fluxes of Europe, *Glob. Chang. Biol.*, (March 2016), 1–14, doi:10.1111/gcb.13191, 2015a.
- Fuchs, R., Herold, M., Verburg, P. H., Clevers, J. G. P. W. and Eberle, J.: Gross changes in reconstructions of historic land cover/use for Europe between 1900 and 2010., *Glob. Chang. Biol. Biol.*, 21, 299–313, doi:10.1111/gcb.12714, 2015b.
- Houghton, R. A.: Carbon Flux to the Atmosphere from Land-Use Changes: 1850-2005, in *TRENDS: A Compendium of Data on Global Change*, Carbon Dioxide Information Analysis Center, Oak Ridge National Laboratory, U.S. Department of Energy, Oak Ridge, Tenn., U.S.A., 2008.

Houghton, R. a., House, J. I., Pongratz, J., van der Werf, G. R., DeFries, R. S., Hansen, M. C., Le Quéré, C. and Ramankutty, N.: Carbon emissions from land use and land-cover change, *Biogeosciences*, 9(12), 5125–5142, doi:10.5194/bg-9-5125-2012, 2012.

Hurt, G. C., Chini, L. P., Frohling, S., Betts, R. A., Feddema, J., Fischer, G., Fisk, J. P., Hibbard, K., Houghton, R. A., Janetos, A., Jones, C. D., Kindermann, G., Kinoshita, T., Klein Goldewijk, K., Riahi, K., Shevliakova, E., Smith, S., Stehfest, E., Thomson, A., Thornton, P., van Vuuren, D. P. and Wang, Y. P.: Harmonization of land-use scenarios for the period 1500–2100: 600 years of global gridded annual land-use transitions, wood harvest, and resulting secondary lands, *Clim. Change*, 109, 117–161, 2011.

Jain, A. K., Meiyappan, P., Song, Y. and House, J. I.: CO<sub>2</sub> emissions from land-use change affected more by nitrogen cycle, than by the choice of land-cover data, *Glob. Chang. Biol.*, 19(9), 2893–2906, doi:10.1111/gcb.12207, 2013.

Klein Goldewijk, K.: Estimating global land use change over the past 300 years: The HYDE Database, *Global Biogeochem. Cycles*, 15(2), 417, doi:10.1029/1999GB001232, 2001.

Klein Goldewijk, K., Beusen, A. and Janssen, P.: Long-term dynamic modeling of global population and built-up area in a spatially explicit way: HYDE 3.1, *The Holocene*, 20(4), 565–573, doi:10.1177/0959683609356587, 2010.

Klein Goldewijk, K., Beusen, A., Van Drecht, G. and De Vos, M.: The HYDE 3.1 spatially explicit database of human-induced global land-use change over the past 12,000 years, *Glob. Ecol. Biogeogr.*, 20(1), 73–86, doi:10.1111/j.1466-8238.2010.00587.x, 2011.

Olofsson, J. and Hickler, T.: Effects of human land-use on the global carbon cycle during the last 6,000 years, *Veget Hist Archaeobot*, 17, 605–615, 2008.

Ramankutty, N. and Foley, J. A.: Estimating historical changes in global land cover: Croplands from 1700 to 1992, *Global Biogeochem. Cycles*, 13(4), 997–1027, doi:10.1029/2009GB003765, 1999.

Shevliakova, E., Pacala, S. W., Malyshev, S., Hurt, G. C., Milly, P. C. D., Caspersen, J. P., Sentman, L. T., Fisk, J. P., Wirth, C. and Crevoisier, C.: Carbon cycling under 300 years of land use change: Importance of the secondary vegetation sink, *Global Biogeochem. Cycles*, 23(2), 1–16, doi:10.1029/2007GB003176, 2009.

Shevliakova, E., Stouffer, R. J., Malyshev, S., Krasting, J. P., Hurt, G. C. and Pacala, S. W.: Historical warming reduced due to enhanced land carbon uptake., *Proc. Natl. Acad. Sci. U. S. A.*, 110(42), 16730–5, doi:10.1073/pnas.1314047110, 2013.

Stocker, B., Roth, R. and Joos, F.: Multiple greenhouse-gas feedbacks from the land biosphere under future climate change scenarios, *Nat. Clim. Chang.*, 3(7), 666–672, doi:10.1038/nclimate1864, 2013.

Wilkenskjeld, S., Kloster, S., Pongratz, J., Raddatz, T. and Reick, C.: Comparing the influence of net and gross anthropogenic land use and land cover changes on the carbon cycle in the MPI-ESM, *Biogeosciences Discuss.*, 11(4), 5443–5469, doi:10.5194/bgd-11-5443-2014, 2014.
